# Supplementary material for: Eco–Friendly Peelable Active Nanocomposite Films Designed for Biological and Chemical Warfare Agents Decontamination
Source: MDPI journal article supplement (doi:10.3390/polym13223999), 2021-11-19
Supplement: s1 [file s1]

## Supporting Info

### Eco-friendly peelable active nanocomposite films designed for Biological and Chemical Warfare Agents decontamination

Gabriela Toader <sup>1, ‡</sup>, Aurel Diacon <sup>2, ‡</sup>, Traian Rotariu <sup>1,\*</sup>, Mioara Alexandru <sup>3,\*</sup>, Edina Rusen <sup>2</sup>, Raluca Elena Ginghină <sup>4</sup>, Florentina Alexe <sup>4</sup>, Ramona Oncioiu <sup>4</sup>, Florina Lucica Zorila <sup>3</sup>, Alice Podaru <sup>1</sup>, Andreea Elena Moldovan <sup>1</sup>, Daniela Pulpea <sup>1</sup>, Ana Mihaela Gavrila <sup>5</sup>, Tanta Verona Iordache <sup>5</sup> and Raluca Șomoghi <sup>5, 6</sup>

<sup>1</sup> Military Technical Academy “Ferdinand I”, 39-49 George Cosbuc Boulevard, 050141 Bucharest, Romania;

<sup>2</sup> Faculty of Applied Chemistry and Materials Science, University ‘Politehnica’ of Bucharest, 1-7 Gh. Polizu Street, 011061 Bucharest, Romania;

<sup>3</sup> Microbiology Laboratory of Horia Hulubei National Institute for R&D in Physics and Nuclear Engineering, 30 Reactorului St., 077125 Bucharest – Măgurele, Romania;

<sup>4</sup> Research and Innovation Center for CBRN Defense and Ecology, 225 Soseaua Oltenitei, 041327 Bucharest, Romania;

<sup>5</sup> National Institute of Research and Development for Chemistry and Petrochemistry, 202 Splaiul Independentei, 060041 Bucharest, Romania;

<sup>6</sup> Petroleum-Gas University of Ploiesti, 100680 Ploiesti, Romania

\*Correspondence: traian.rotariu@mta.ro (T.R.), mioara.alexandru@nipne.ro (M.A.)

‡ Co-first authors, equally contributed to this study

**Table S1.** *Evaporation rate of the decontamination solutions*

| Sample | Evaporation rate (%wt./h) |       |       |       |
|--------|---------------------------|-------|-------|-------|
|        | 25 °C                     | 30 °C | 35 °C | 40 °C |
| SD1    | 5.5                       | 10.2  | 15.4  | 23.0  |
| SD2    | 5.5                       | 10.1  | 15.6  | 21.4  |
| SD3    | 5.5                       | 9.6   | 13.1  | 22.5  |
| SD4    | 4.9                       | 8.6   | 14.4  | 20.6  |
| SD5    | 5.5                       | 8.5   | 14.7  | 21.5  |
| SD6    | 5.4                       | 9.8   | 15.2  | 21.8  |
| SD7    | 5.3                       | 10.4  | 15.9  | 23.3  |
| SD8    | 6.0                       | 11.4  | 16.9  | 23.3  |
| SD9    | 6.1                       | 10.4  | 15.6  | 21.9  |
| SD10   | 6.2                       | 10.6  | 16.5  | 22.2  |
| SD11   | 5.0                       | 10.0  | 16.0  | 23.7  |
| SD12   | 5.6                       | 10.2  | 16.1  | 23.6  |

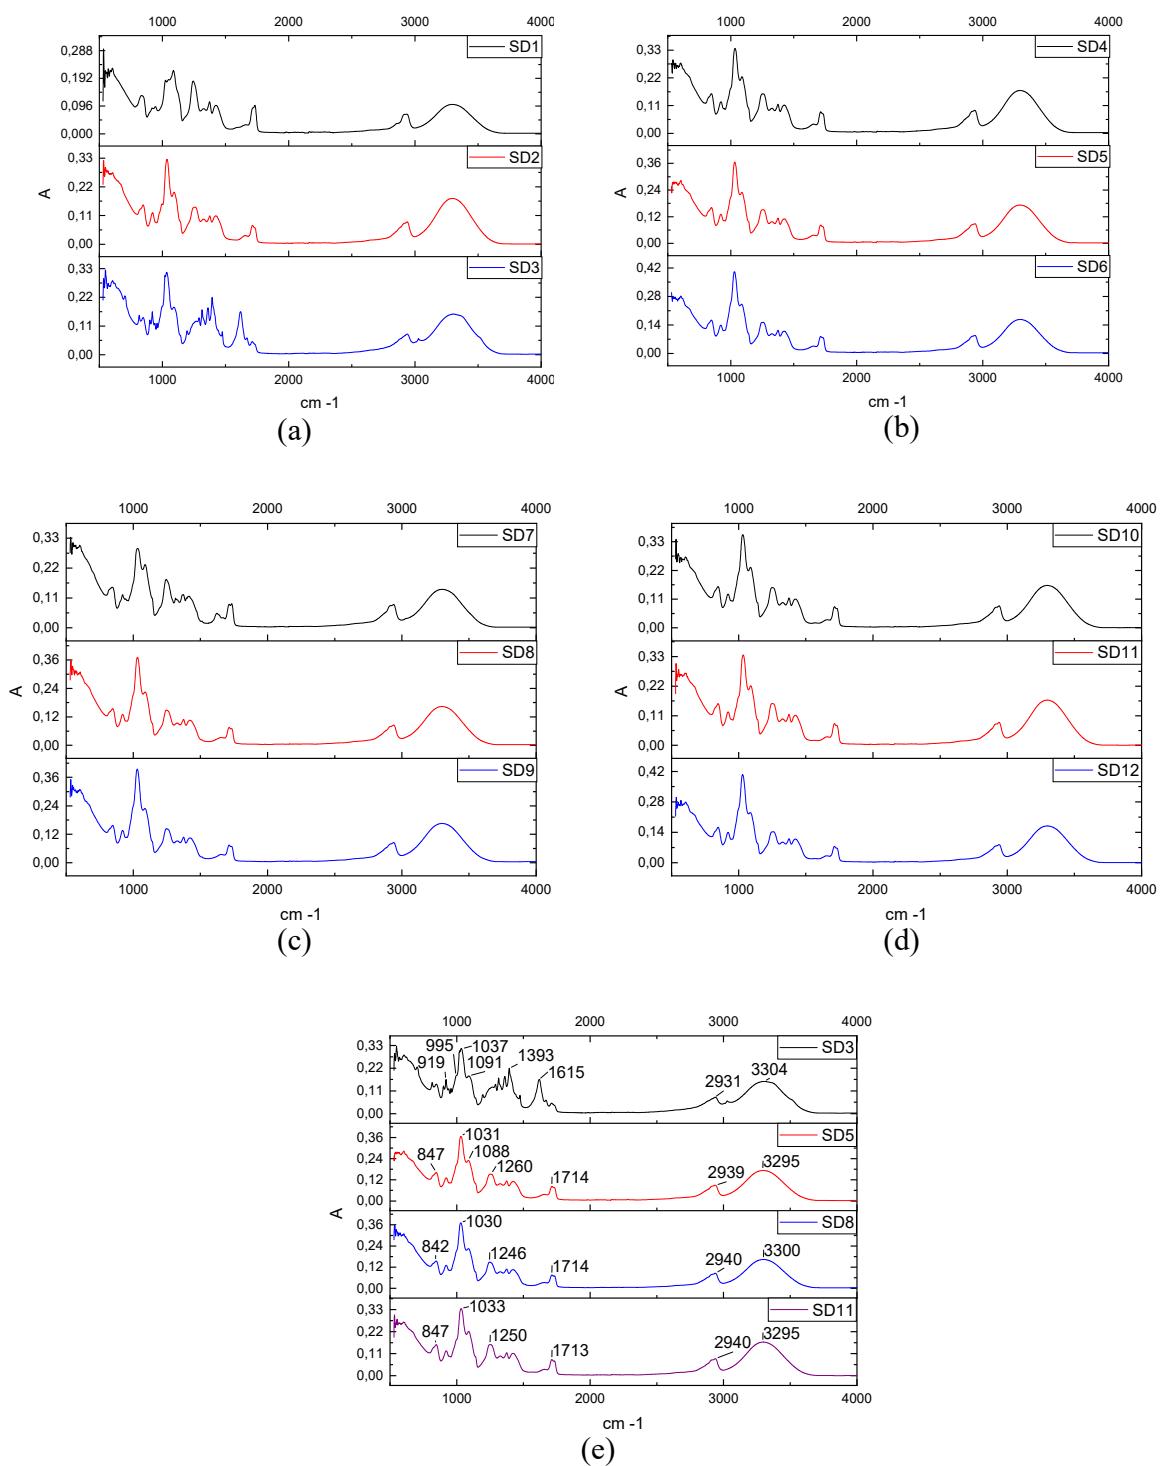

**Figure S1.** FT-IR spectra of the polymer nanocomposite films.

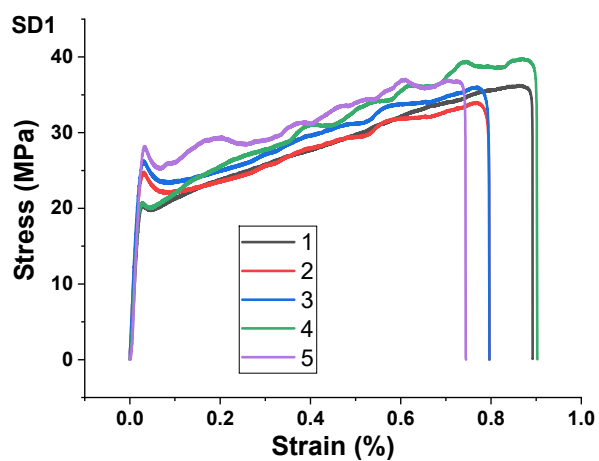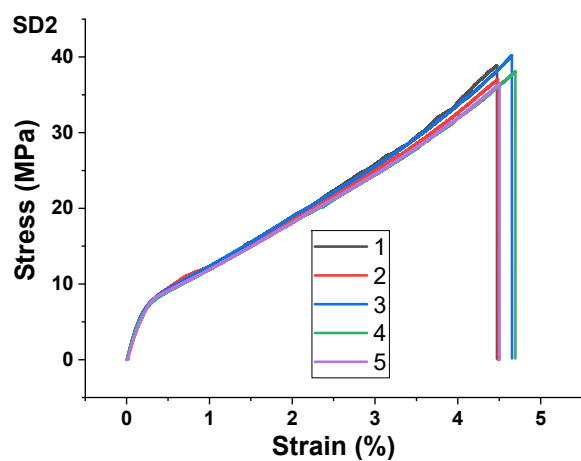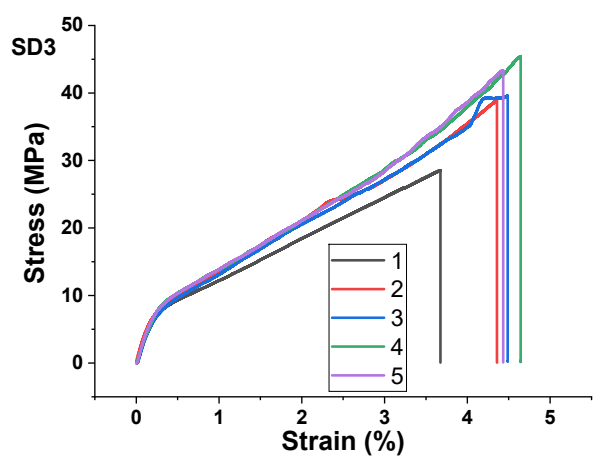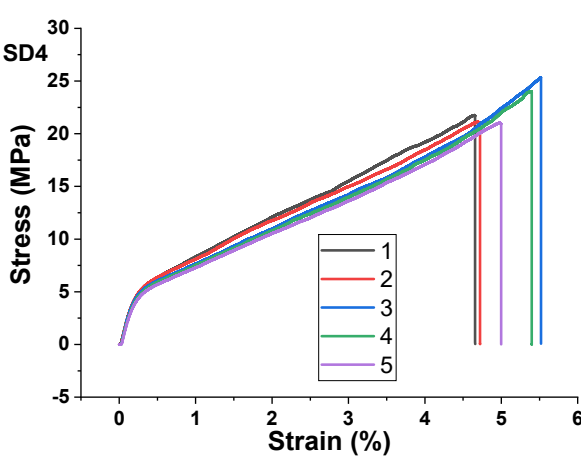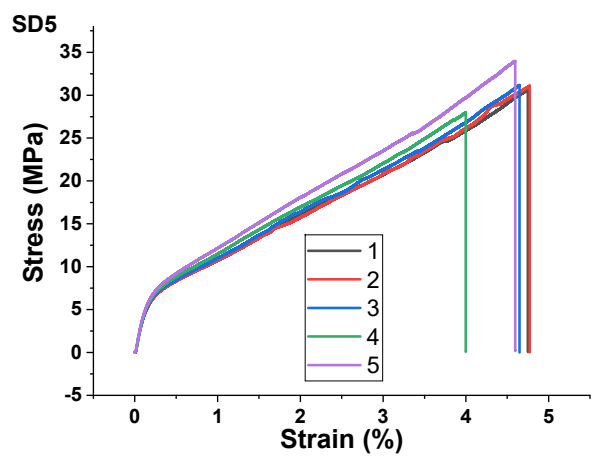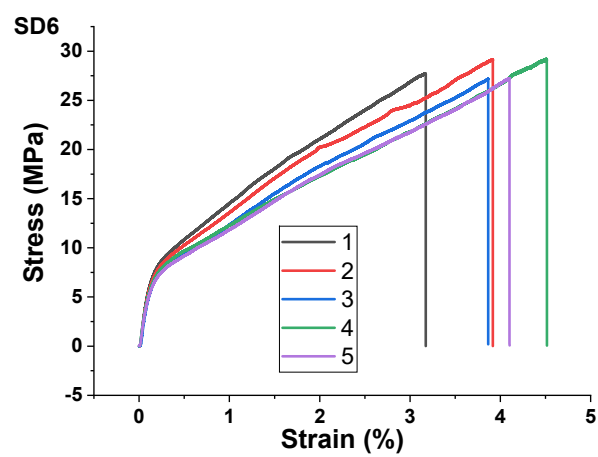

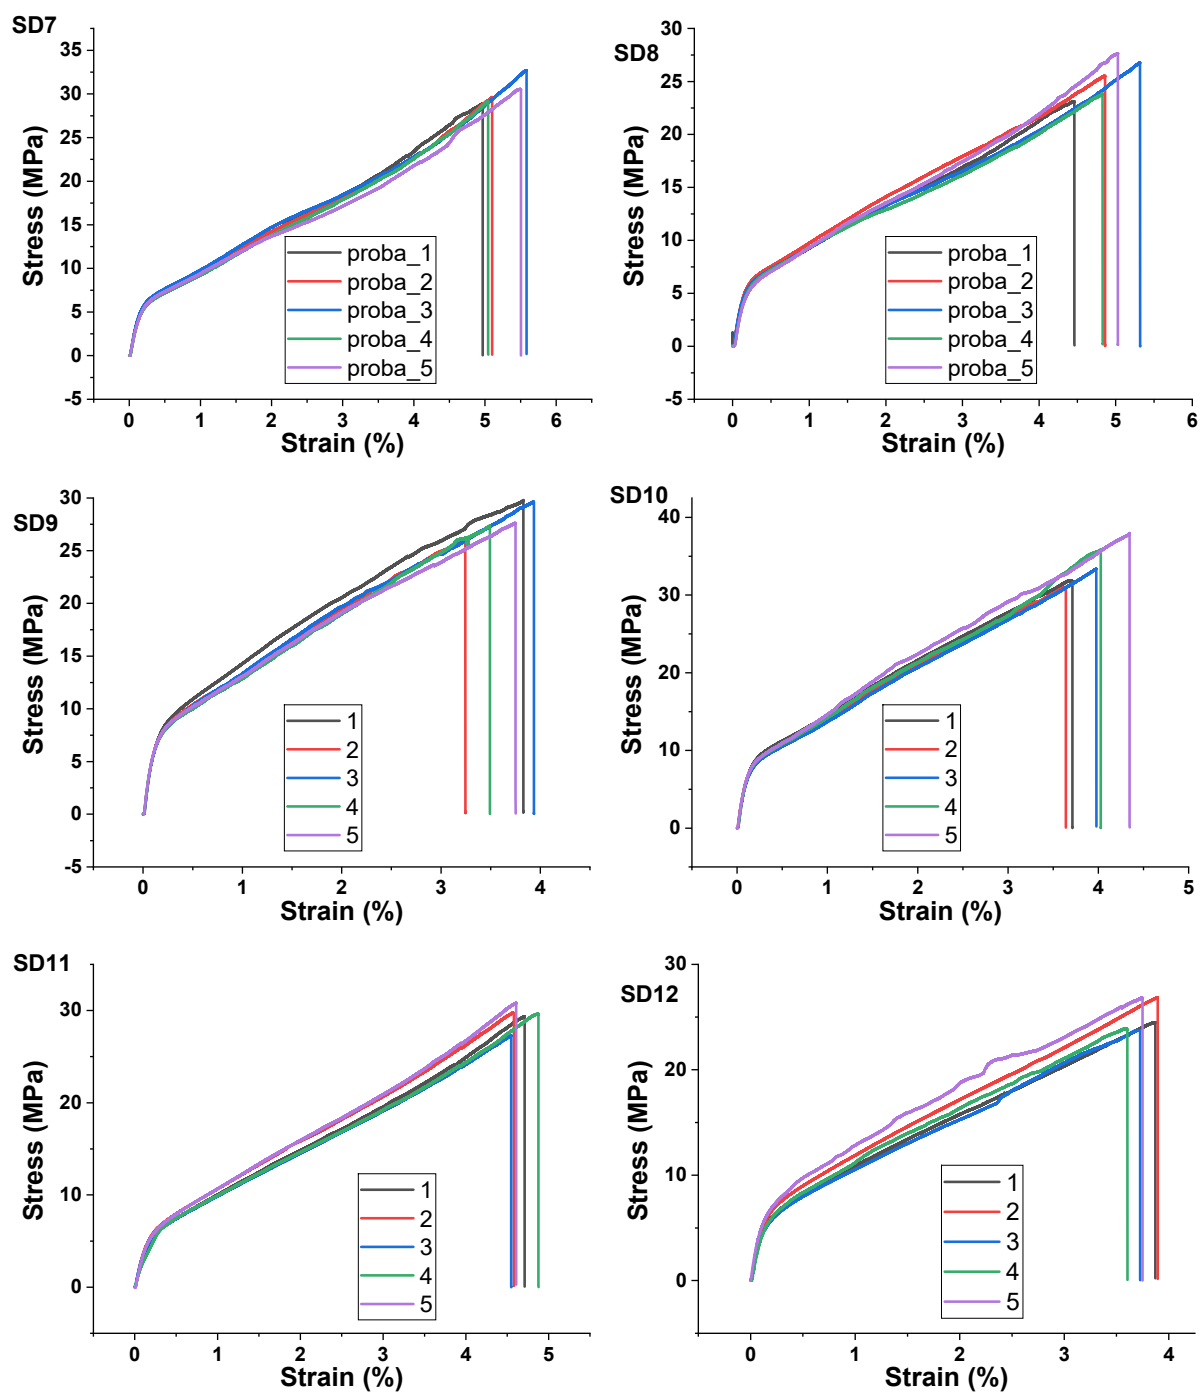

Figure S2. Tensile tests results.

**Table S2.** Tensile tests results.

| Sample | $\epsilon_{\max}$ (%) | $\sigma_{\max}$ (MPa) | Young modulus (MPa) |
|--------|-----------------------|-----------------------|---------------------|
| SD1    | 0.8769                | 36.0593               | 41.123              |
| SD2    | 4.6537                | 40.1990               | 8.638               |
| SD3    | 4.4317                | 43.3565               | 9.783               |
| SD4    | 4.9943                | 20.9684               | 4.198               |
| SD5    | 4.5949                | 33.9905               | 7.397               |
| SD6    | 4.0999                | 27.2418               | 6.644               |
| SD7    | 5.0431                | 29.1408               | 5.778               |
| SD8    | 4.8274                | 23.8357               | 4.938               |
| SD9    | 3.7492                | 27.6316               | 7.370               |
| SD10   | 4.6081                | 30.8314               | 6.691               |
| SD11   | 3.9761                | 33.3954               | 8.399               |
| SD12   | 3.8693                | 24.5156               | 6.336               |

### Biological decontamination tests

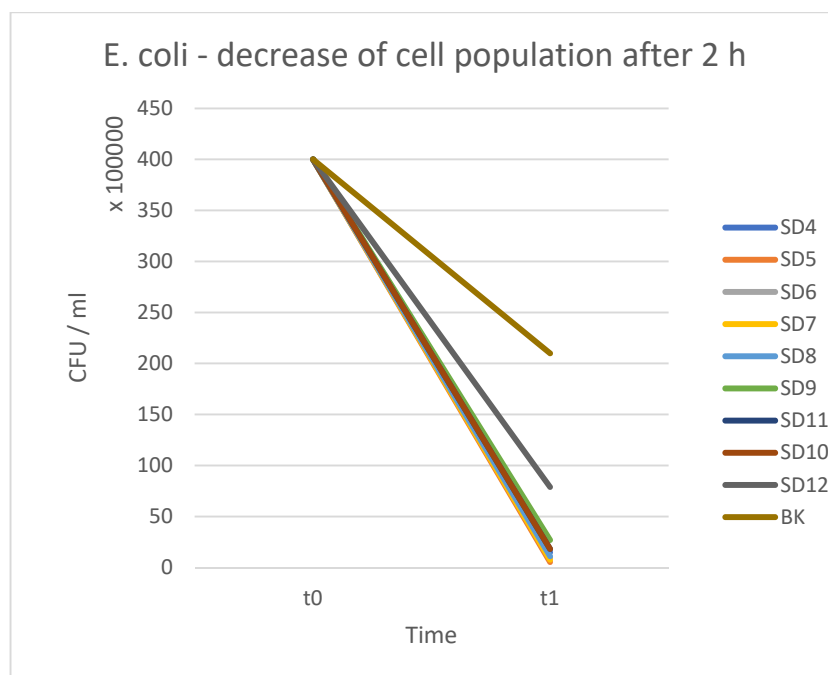

**Figure S3.** Cell population after 2 hours in contact with the decontamination solutions for *E. coli*.

**Table S3.** Antimicrobial activity of the decontamination solutions against *E.coli*.

|                                                          | SD4<br>(UFC /<br>mL)     | SD5<br>(UFC /<br>mL)     | SD6<br>(UFC /<br>mL)     | SD7<br>(UFC /<br>mL)     | SD8<br>(UFC /<br>mL)    | SD9<br>(UFC /<br>mL)     | SD10<br>(UFC /<br>mL)   | SD11<br>(UFC /<br>mL)   | SD12<br>(UFC /<br>mL)   | SD3<br>(UFC /<br>mL)     |
|----------------------------------------------------------|--------------------------|--------------------------|--------------------------|--------------------------|-------------------------|--------------------------|-------------------------|-------------------------|-------------------------|--------------------------|
| <b>T<sub>0</sub></b><br>(10 <sup>5</sup><br>UFC /<br>ml) | 52 ×<br>10 <sup>5</sup>  | 65 ×<br>10 <sup>5</sup>  | 50 ×<br>10 <sup>5</sup>  | 45 ×<br>10 <sup>5</sup>  | 65 ×<br>10 <sup>5</sup> | 200 ×<br>10 <sup>5</sup> | 59 ×<br>10 <sup>5</sup> | 53 ×<br>10 <sup>5</sup> | 49 ×<br>10 <sup>5</sup> | 280 ×<br>10 <sup>5</sup> |
| <b>T<sub>1</sub></b><br>(10 <sup>5</sup><br>UFC /<br>mL) | 4.5 ×<br>10 <sup>5</sup> | 5.1 ×<br>10 <sup>5</sup> | 3.8 ×<br>10 <sup>5</sup> | 8.9 ×<br>10 <sup>5</sup> | 50 ×<br>10 <sup>5</sup> | 100 ×<br>10 <sup>5</sup> | 43 ×<br>10 <sup>3</sup> | 35 ×<br>10 <sup>3</sup> | 25 ×<br>10 <sup>3</sup> | 250 ×<br>10 <sup>5</sup> |

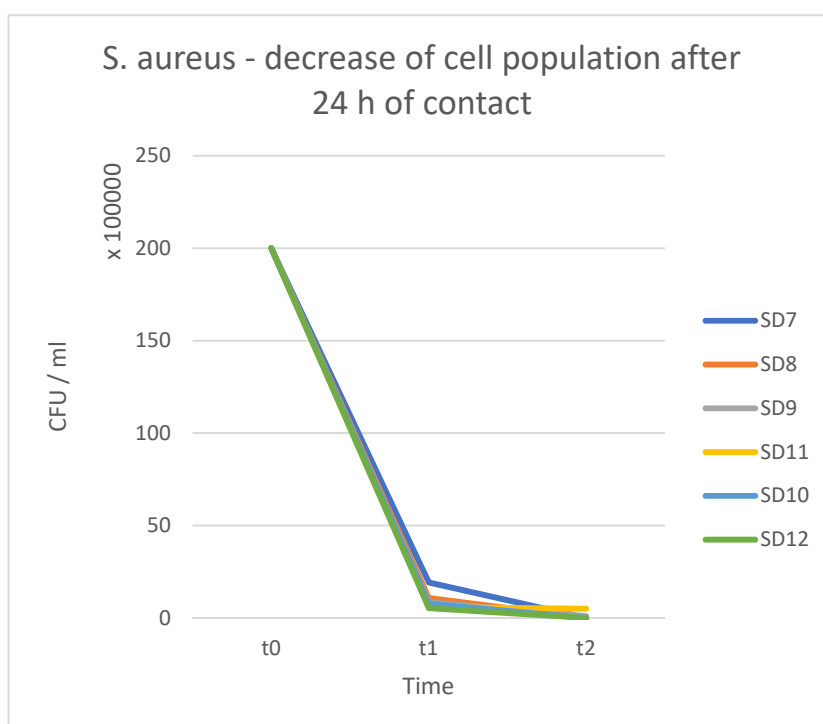**Figure S4.** Cell population after 24 hours in contact with the decontamination solutions for *E. coli*.**Table S4.** Antimicrobial activity of the decontamination solutions against *S. aureus*.

|                                                          | SD4<br>(UFC /<br>mL)     | SD5<br>(UFC /<br>mL)     | SD6<br>(UFC /<br>mL)    | SD7<br>(UFC /<br>mL)    | SD8<br>(UFC /<br>mL)    | SD9<br>(UFC /<br>mL)     | SD10<br>(UFC /<br>mL)    | SD11<br>(UFC /<br>mL)    | SD12<br>(UFC /<br>mL)    | SD3<br>(UFC /<br>mL)     |
|----------------------------------------------------------|--------------------------|--------------------------|-------------------------|-------------------------|-------------------------|--------------------------|--------------------------|--------------------------|--------------------------|--------------------------|
| <b>T<sub>0</sub></b><br>(10 <sup>5</sup><br>UFC /<br>mL) | 320 ×<br>10 <sup>5</sup> | 290 ×<br>10 <sup>5</sup> | 90 ×<br>10 <sup>5</sup> | 40 ×<br>10 <sup>5</sup> | 32 ×<br>10 <sup>5</sup> | 290 ×<br>10 <sup>5</sup> | 250 ×<br>10 <sup>5</sup> | 270 ×<br>10 <sup>5</sup> | 290 ×<br>10 <sup>5</sup> | 300 ×<br>10 <sup>5</sup> |
| <b>T<sub>1</sub></b><br>(10 <sup>5</sup><br>UFC /<br>mL) | 289 ×<br>10 <sup>5</sup> | 66 × 10 <sup>5</sup>     | 43 ×<br>10 <sup>5</sup> | < 10 <sup>2</sup>       | < 10 <sup>2</sup>       | 10 <sup>3</sup>          | 2 × 10 <sup>3</sup>      | < 10 <sup>2</sup>        | < 10 <sup>2</sup>        | 290 ×<br>10 <sup>5</sup> |

## Chemical Decontamination tests

### Sulphur mustard

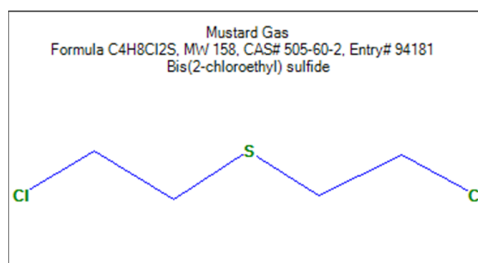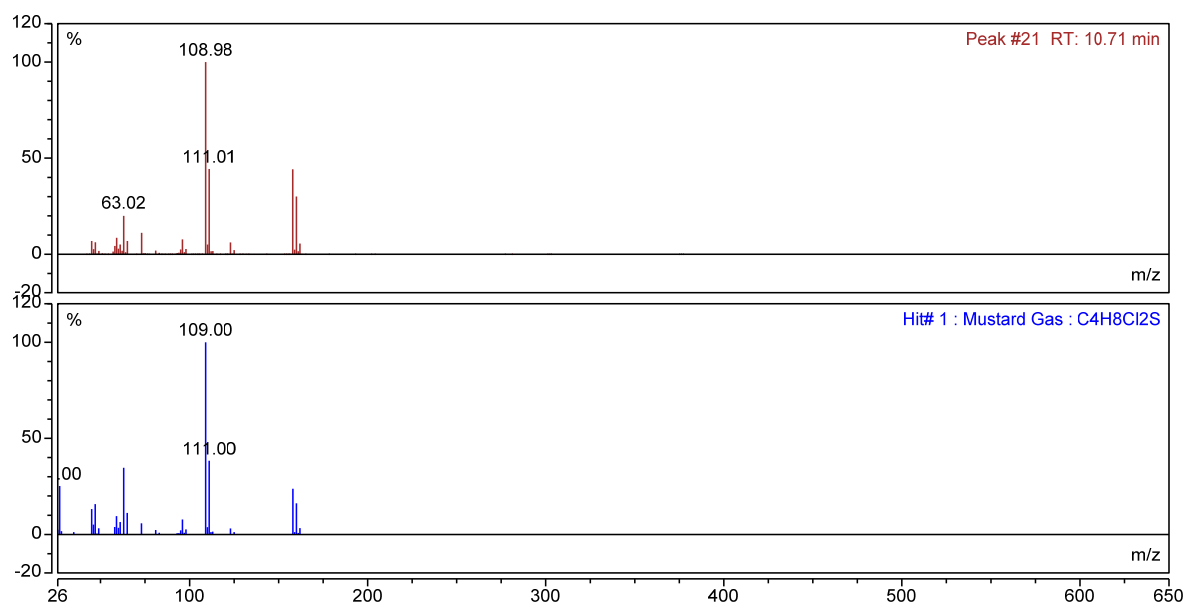

**Figure S5.** Mass spectra of HD (up – from analysis; down – NIST database), RT – 10.71 min.

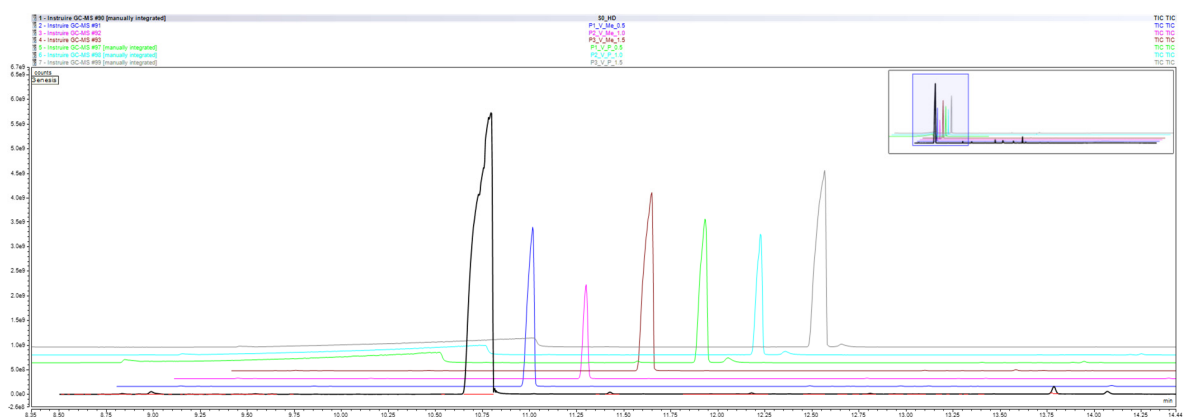

**Figure S6.** Chromatograms multigraph.

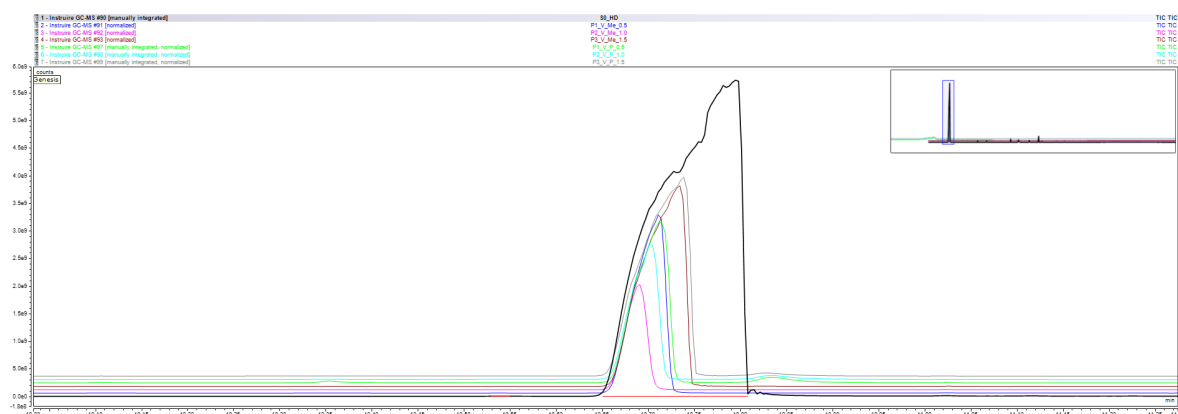

**Figure S7.** Total Ions Chromatograms overlap for all samples, representing HD at the RT (retention time): 10.70;

(blank - initial HD contamination; blue - residual HD after decontamination with SD10, extracted with DCM from the metallic surface; magenta - residual HD after decontamination with SD11, extracted with DCM from the metallic surface; burgundy - residual HD after decontamination with SD12, extracted with DCM from the metallic surface; green – unreacted HD found after decontamination in peeled film SD10, extracted with DCM; cyan - unreacted HD found after decontamination in peeled film SD11, extracted with DCM; gray - unreacted HD found after decontamination in peeled film SD12, extracted with DCM).

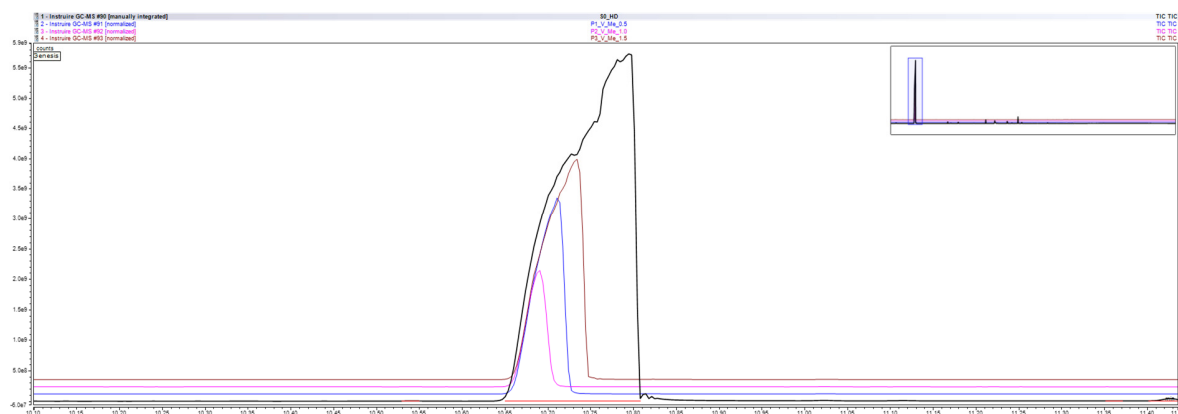

**Figure S8.** Chromatograms overlap for reference sample and samples extracted from the metallic surface after decontamination.



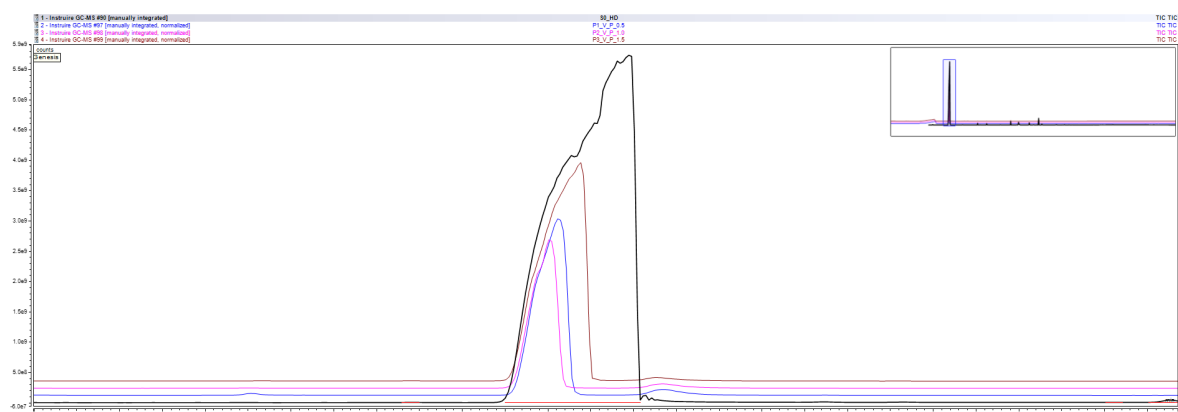

**Figure S9.** Chromatograms overlap for reference sample and samples extracted from the nanocomposite film after decontamination.

**Table S5.** Degradation products of HD monitored during the decontamination process.

| No | Compound                                 | RT    | AS0       | AP1Me         | AP2Me    | AP3Me     | AP1P      | AP2P     | AP3P      |
|----|------------------------------------------|-------|-----------|---------------|----------|-----------|-----------|----------|-----------|
| 1  | Dithiane                                 | 8.99  | 1887741   | 124343        | 32416    | 114606    | 0         | 0        | 0         |
| 2  | HD                                       | 10.79 | 568555828 | 12350046<br>1 | 51799820 | 189174524 | 119498537 | 82888058 | 207352784 |
| 3  | Thiodiglycol (TDG)                       | 10.84 | 0         | 0             | 0        | 0         | 4218280   | 3269076  | 2301103   |
| 4  | Etanol 2-((2-chloroethyl)thio) 1-acetate | 12.67 | 0         | 268287        | 129480   | 515104    | 200100    | 190421   | 563526    |
| 5  | Bis(2-chloroethyl) disulfide             | 13.78 | 3485028   | 475053        | 252378   | 547932    | 378536    | 194092   | 453803    |
| 6  | Bis((2-chloroethylthio)ethyl)sulfide     | 14.07 | 1270521   | 0             | 0        | 0         | 0         | 0        | 0         |
| 7  | Sesqui-mustard                           | 17.33 | 7045057   | 662471        | 208319   | 895429    | 782569    | 978155   | 1386415   |
| 8  | O-mustard                                | 20.33 | 14223291  | 1097079       | 314214   | 1449068   | 1172060   | 2040661  | 2238374   |

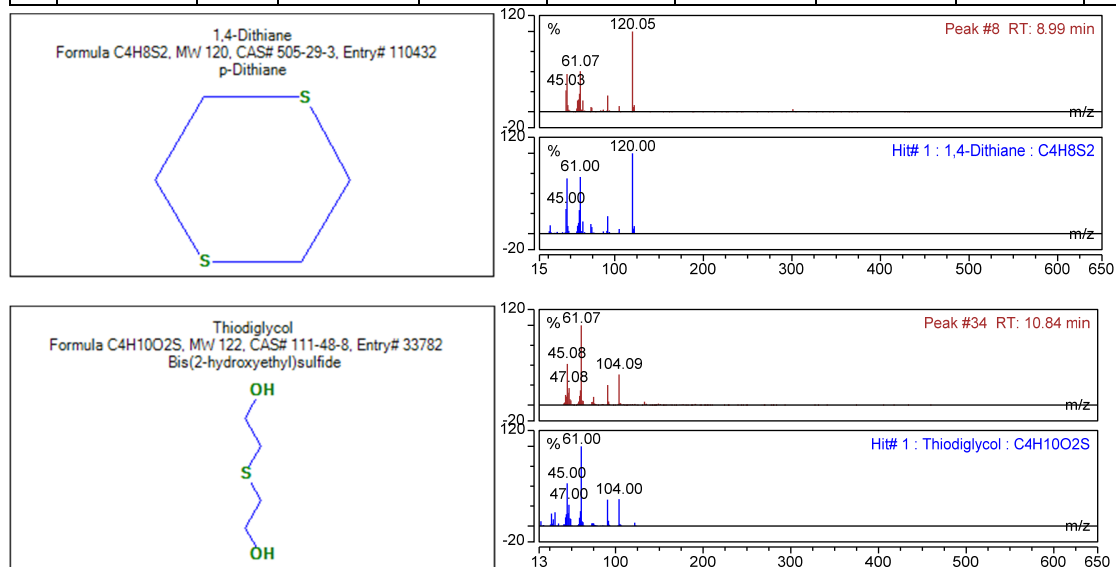

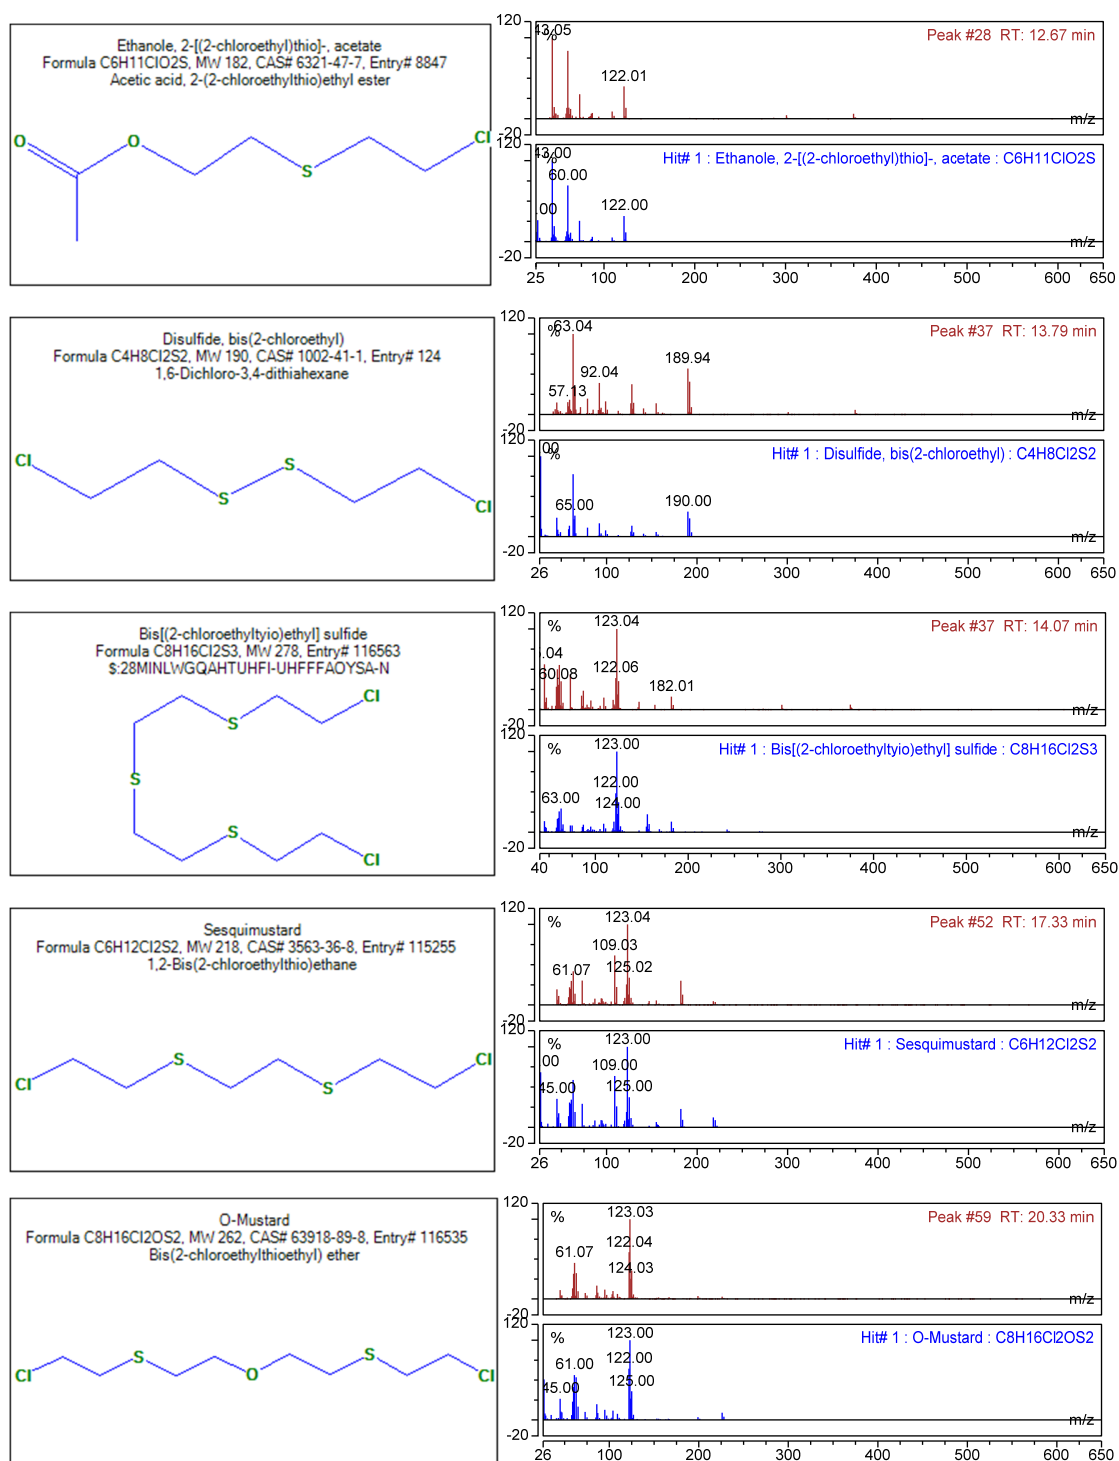

**Figure S10.** Degradation products of Yperite.

## Dimethyl methylphosphonate

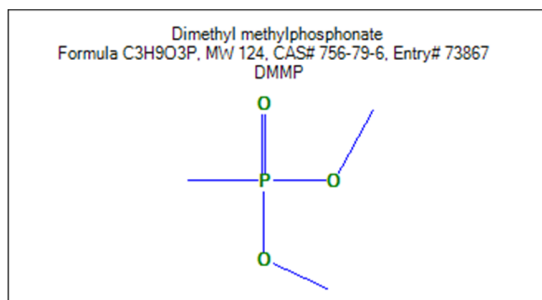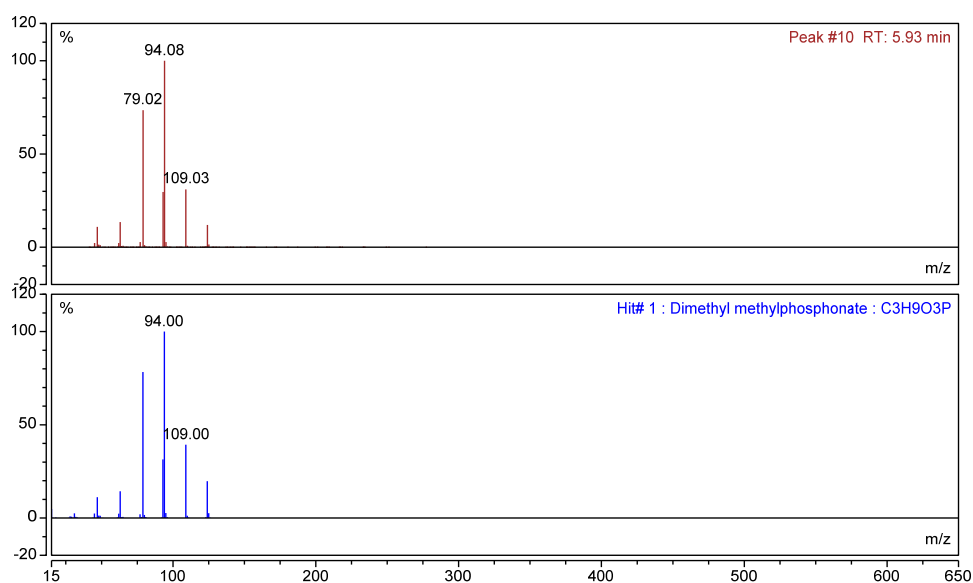

**Figure S11.** Mass spectra of HD (up – from analysis; down – NIST database) RT – 5.93 min.

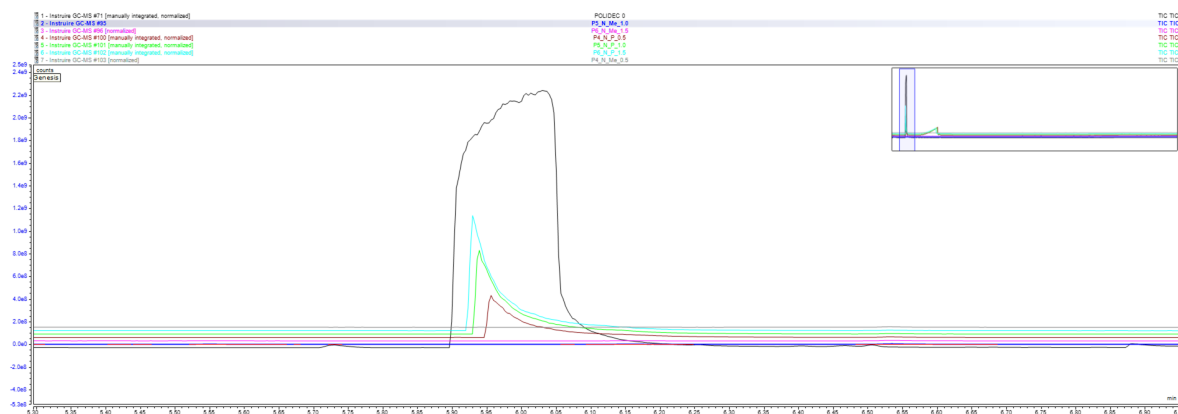

**Figure S12.** Chromatograms overlap for all samples.

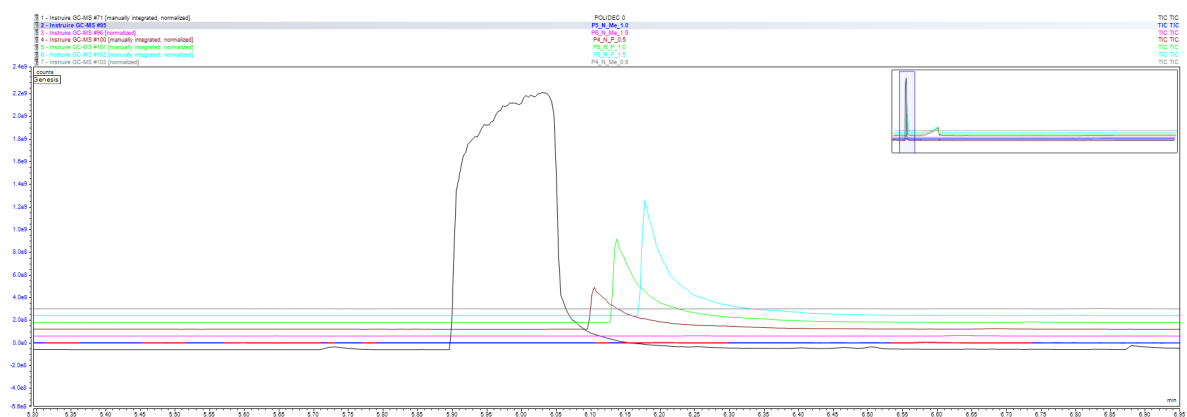

**Figure S13.** Chromatograms overlap for all samples.

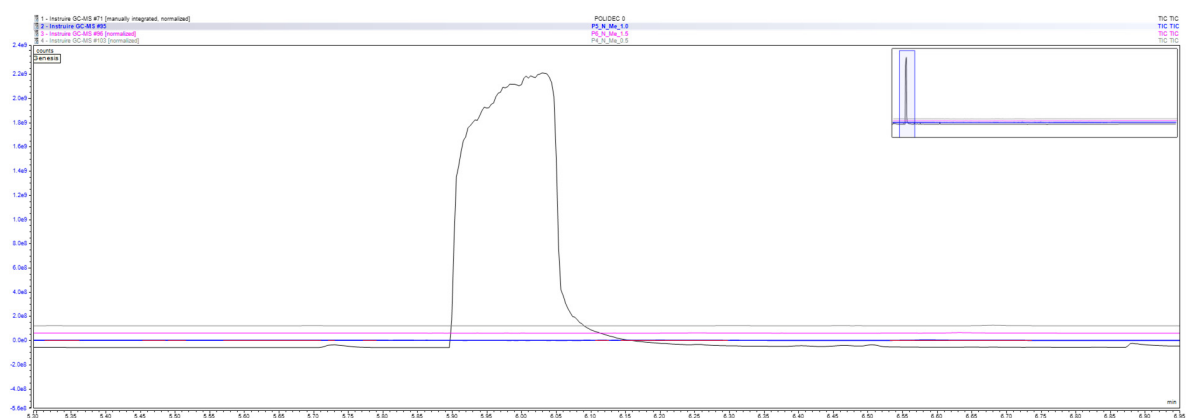

**Figure S14.** Chromatograms overlap for reference sample and samples extracted from the metallic surface after decontamination.

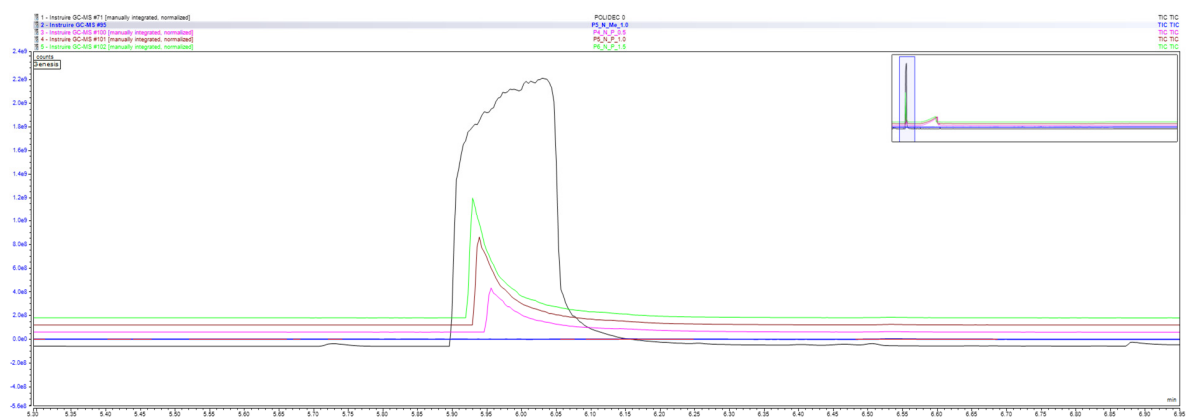

**Figure S15.** Chromatograms overlap for reference sample and samples extracted from the nanocomposite film after decontamination.
